# Supplementary material for: Magnetite decorated graphite nanoplatelets as cost effective CO2 adsorbent
Source: Royal Society of Chemistry journal article supplement (doi:10.1039/c1jm10996k), 2011-01-01
Supplement: c1jm10996k.pdf [file c1jm10996k.pdf]

## Supplementary Information

### Magnetite decorated graphite nanoplatelets as cost effective CO<sub>2</sub> adsorbent

Ashish Kumar Mishra and Sundara Ramaprabhu \*

*Alternative Energy and Nanotechnology Laboratory (AENL), Nano Functional Materials  
Technology Centre (NFMTC), Department of Physics, Indian Institute of Technology Madras,  
Chennai – 600036, India*

\*Email:- [ramp@iitm.ac.in](mailto:ramp@iitm.ac.in)

#### 1. Results and Discussion

##### 1.1 FTIR study of *f*-GNP

FTIR study was performed to confirm the attachment of functional groups at the surface of GNP by acid treatment. Figure-S1 shows the FTIR spectra of graphite nanoplatelets (GNP) and functionalized graphite nanoplatelets (*f*-GNP). This spectra suggests the attachment of oxygen containing functional groups (-COOH, >C=O etc.) at the surface of GNP due to acid treatment. These functional groups at the surface of *f*-GNP act as anchoring sites for magnetite nanoparticles and hence better decoration over the surface.<sup>1</sup>

##### 1.2 XPS study

Formation of Fe<sub>3</sub>O<sub>4</sub>-*f*-GNP nanocomposite was also confirmed with XPS analysis. Magnesium K<sub>α</sub> radiation was used for X- ray generation. Figure-S2 is the wide scan spectrum of the sample in which the photoelectron lines at binding energy of about 285, 532, 711.5 and 725eV are attributed to C1s, O1s, Fe2p<sub>1/2</sub> and Fe2p<sub>3/2</sub> respectively. These peaks confirm the formation of Fe<sub>3</sub>O<sub>4</sub>-*f*-GNP nanocomposite.<sup>2-4</sup>

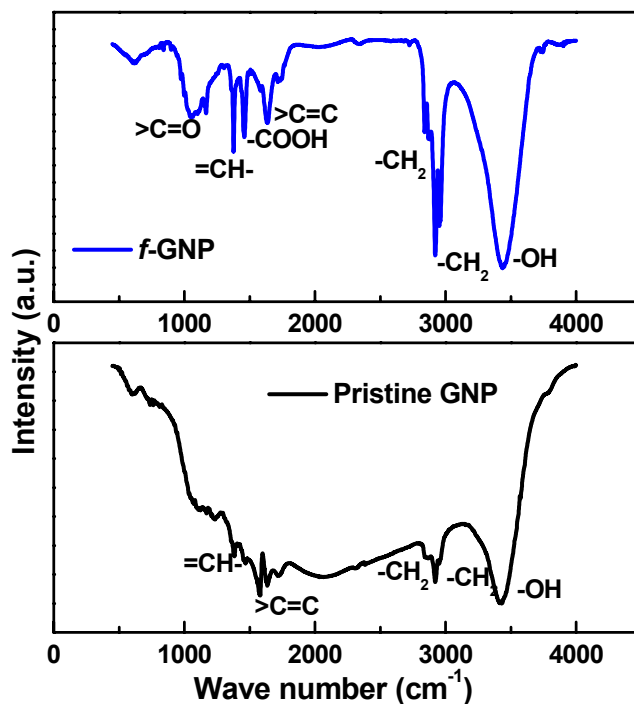

Figure-S1 FTIR spectra of pristine GNP and functionalized GNP

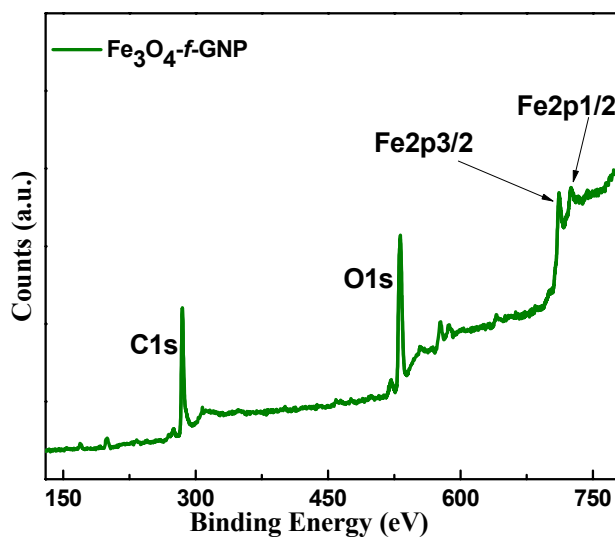

Figure- S2 X-ray photoelectron spectroscopy of  $Fe_3O_4$ -f-GNP nanocomposite

### 1.3 Surface area measurement

Nitrogen adsorption-desorption has been performed to analyze the textural nature of nanocomposite. Figure-S3 shows the N<sub>2</sub> adsorption-desorption isotherm for Fe<sub>3</sub>O<sub>4</sub>-*f*-GNP nanocomposite. It shows hysteresis for nanocomposite suggesting the high surface area of nanocomposite. The specific surface area of Fe<sub>3</sub>O<sub>4</sub>-*f*-GNP nanocomposite, calculated using BET equation was found to be 102.35m<sup>2</sup>/g. Pore diameter was found to mainly vary from 3nm to 10nm for nanocomposite, suggesting the possible mesoporous nature of nanocomposite. The total pore volume using BJH method was found about 0.1509cm<sup>3</sup>/g for nanocomposite.

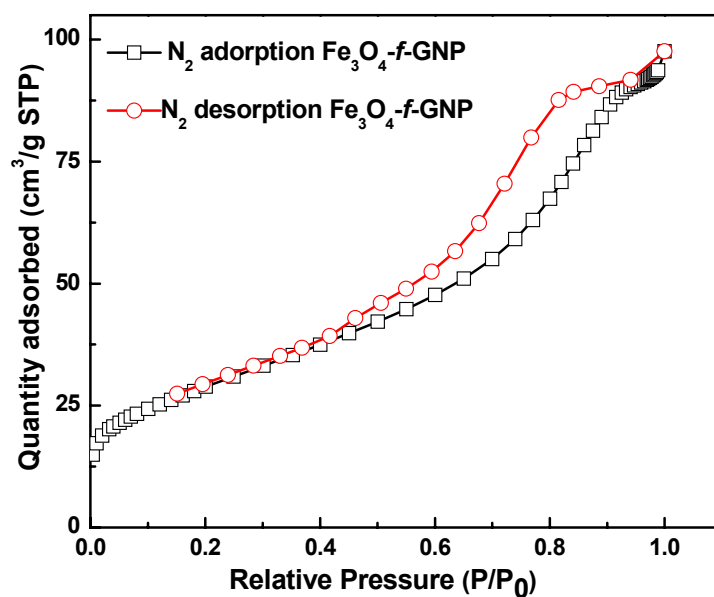

Figure- S3 N<sub>2</sub> adsorption-desorption isotherm for *f*-GNP and Fe<sub>3</sub>O<sub>4</sub>-*f*-GNP nanocomposite

### 1.4 Raman spectroscopy analysis

Figure-S4 shows the Raman spectrum of pristine and CO<sub>2</sub> adsorbed Fe<sub>3</sub>O<sub>4</sub>-*f*-GNP nanocomposite. It exhibits the D-band (1334.4cm<sup>-1</sup>) and G-band (1563.4cm<sup>-1</sup>), along with extra

peaks were observed at lower Raman shift values.<sup>5</sup> G-band corresponds to the tangential modes of vibrations, while D-band corresponds to the defect of GNP.<sup>6</sup> Extra peaks arise due to the formation of Fe<sub>3</sub>O<sub>4</sub> nanoparticles over the surface of *f*-GNP. Peaks at lower Raman shift (218.6, 284.5, 391 and 588.6cm<sup>-1</sup>) values may correspond to vibration modes of Fe-O bonds of Fe<sub>3</sub>O<sub>4</sub> nanoparticles and Fe-C bonds at the surface of *f*-GNP.<sup>7,8</sup> Hence Raman study again confirms the formation of magnetite nanoparticles over surface of *f*-GNP.

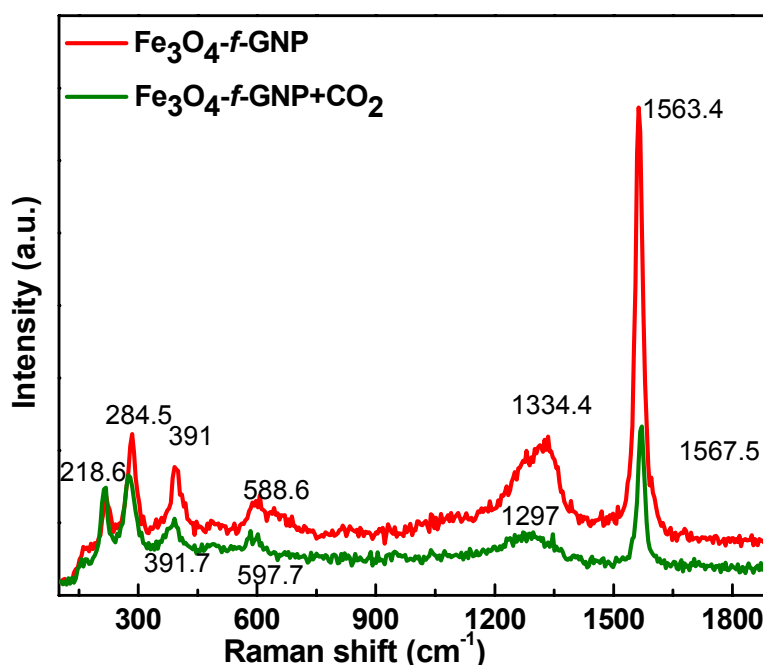

Figure- S4 Raman spectra of pristine and CO<sub>2</sub> adsorbed Fe<sub>3</sub>O<sub>4</sub>-*f*-GNP nanocomposite

In the case of CO<sub>2</sub> adsorbed Fe<sub>3</sub>O<sub>4</sub>-*f*-GNP nanocomposite G-band shifts to higher value of 1567.5cm<sup>-1</sup>, which may be attributed to the physisorption of CO<sub>2</sub> at the surface of nanocomposite. Adsorbed CO<sub>2</sub> molecules at the surface of nanocomposite possibly increase the reduced mass of harmonic oscillator and hence shift of G-band towards higher frequency. Peaks

corresponding to the Fe-O and Fe-C bonds ( $391.7$  and  $597.7\text{cm}^{-1}$ ) also shows shift towards higher value. These peak shifts may correspond to the strong chemical interaction between magnetite nanoparticles and  $\text{CO}_2$  molecule. Hence, Raman spectroscopy study of  $\text{CO}_2$  adsorbed  $\text{Fe}_3\text{O}_4$ -f-GNP nanocomposite also suggests the physicochemical adsorption of  $\text{CO}_2$ .<sup>9</sup>

### 1.5 Dubinin-Radushkevitch (D.R.) Equation

The  $\text{CO}_2$  adsorption isotherm at room temperature for nanocomposite was treated by the D.R. equation.<sup>10,11</sup> D.R. equation can be represented as follows-

$$\ln W = \ln W_0 + (R/E)^2 [T \ln(P_0/P)]^2 \text{ -----(S1)}$$

Where 'W' is the amount of adsorbed  $\text{CO}_2$ , ' $W_0$ ' is the micropore volume and 'E' is the characteristic adsorption energy. 'W' is given by-

$$W = \frac{N \times M}{\rho} \text{ -----(S2)}$$

Where 'N' is the amount of  $\text{CO}_2$  adsorbed in mol/g, 'M' is the molecular weight ( $M=44\text{g}$ ) and ' $\rho$ ' is the density of the  $\text{CO}_2$  at the temperature T ( $\rho=0.85\text{g/cm}^3$  at  $298\text{K}$ ). D.R. equation is based on the postulate that the mechanism for adsorption in micropores is that of pore filling rather than a layer-by-layer formation of a film on the walls of the pores.

Figure-S5 shows the variation of  $\ln(N)$  with  $[T \times \ln(P/P_0)]^2$  and DR equation fit for  $\text{Fe}_3\text{O}_4$ -f-GNP nanocomposite in two different pressures ranges 3-5bar and 6-14bar at room temperature ( $25^\circ\text{C}$ ). Micropore volume can be calculated by finding the intercept at Y-axis ( $N_0$ ) and using the equation-S3 as below-

$$W_0 = \frac{N_0 \times M}{\rho} \text{ -----(S3)}$$

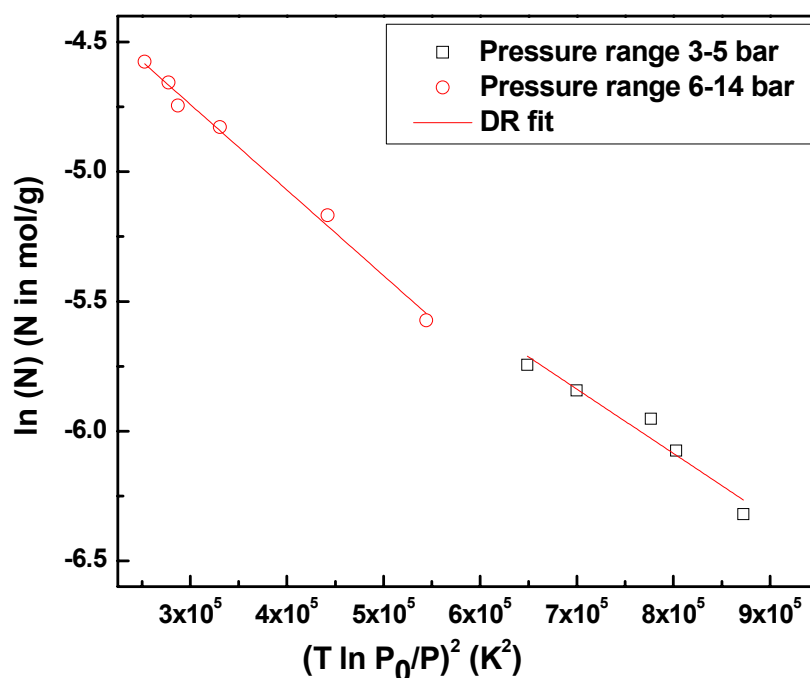

Figure-S5 Dubinin-Radushkevitch fit for  $Fe_3O_4$ -*f*-GNP nanocomposite

Micropore volume depends upon the intercept and micropore volume for  $Fe_3O_4$ -*f*-GNP nanocomposite was found to be  $0.858 \text{ cm}^3/\text{g}$  with the adsorption in lower pressure range (3-5bar). Micropore volume at higher pressure range (6-14bar) was found to be  $1.217 \text{ cm}^3/\text{g}$ . Large deviation of micropore volume for nanocomposite measured by DR fit of  $CO_2$  adsorption with BJH method (pore volume= $0.1509 \text{ cm}^3/\text{g}$ ) for  $N_2$  adsorption-desorption isotherm was observed. In low pressure range isotherm deviates from DR fit, which may be attributed mainly to the interaction of  $CO_2$  with magnetite nanoparticles and formation bicarbonates and carbonates.<sup>24,31</sup> In high pressure range increase in deviation was observed, which may be associated to the additional multilayer adsorption at high pressures. As DR fit suggests micropore filling, hence the large deviation of micropore volume also confirms the physicochemical adsorption behavior of  $Fe_3O_4$ -*f*-GNP nanocomposite for  $CO_2$ .

## References

1. A.K. Mishra and S. Ramaprabhu, *J. Hazard. Mater.*, 2011, **185**, 322.
2. A.K. Mishra and S. Ramaprabhu, *J. Phys. Chem. C*, 2010, **114**, 2583.
3. Z. Shu and S. Wang, *J. Nanomaterials.*, 2009, **2009**, 340217.
4. T. Missana, C. Maffiotte and M. Garcia-Gutierrez, *J. Colloid Interf. Sci.*, 2003, **261**, 154.
5. Q. Weizhon, T. Liu, F. Wei, Z. Whang, G. Luo, H. Yu, and Z. Li, *Carbon.*, 2003, **41**, 2613.
6. U.J. Kim, C.A. Furtado, X. Liu, G. Chen and P.C. Eklund, *J. Am. Chem. Soc.*, 2005, **268**, 241.
7. S. Tiwari, D.M. Phase and R.J. Choudhary, *Appl. Phys. Lett.*, 2008, **93**, 234108.
8. S. Tiwari, R. Prakash, R.J. Choudhary, D.M. Phase, *J. Phys. D: Appl. Phys.*, 2007, **40**, 4943.
9. A.K. Mishra and S. Ramaprabhu, *Energy Environ. Sci.*, 2011, **4**, 889.
10. M.M. dubinin and L.V. Redushkevitch, *Zh. Fiz. Khim.*, 1947, **21**, 1351.
11. M. Polanyi, *Verhandt. Deut. Phys. Ges.*, 1914, **16**, 1012.
